## INVESTIGATION OF STIMULUS–SECRETION COUPLING IN EQUINE SWEAT GLAND EPITHELIA USING CELL CULTURE TECHNIQUES

STUART M. WILSON, JOHN D. PEDIANI, WING HUNG KO, DOUGLAS L. BOVELL\*, SUSAN KITSON, IAN MONTGOMERY, URSILLA M. O. BROWN, GODFREY L. SMITH, HUGH Y. ELDER AND DAVID MCEWAN JENKINSON

*The Institute of Physiology, University of Glasgow, Glasgow G12 8QQ, UK*

*Accepted 24 June 1993*

### Summary

When sweat glands isolated from samples of horse skin were explanted and cultured under favourable conditions, they could exhibit cellular outgrowth. This growth could be maintained for 2–4 weeks and these primary cultures were then disaggregated and the resultant cell suspensions used to initiate epithelial cell lines. Secretion from intact equine sweat glands is regulated by  $\beta_2$ -adrenoceptors and appears to be mediated by cyclic AMP, but there is evidence that calcium may also play a role. Adrenaline could increase the cyclic AMP content of the cultured cells and this response was mediated by  $\beta_2$ -adrenoceptors. Adrenaline was also able to evoke a small increase in intracellular free calcium ( $[Ca^{2+}]_i$ ) but the pharmacology of this response remains obscure. Adrenaline thus activates at least two potentially important second-messenger signalling pathways which have the capacity to interact, because adrenaline-evoked cyclic AMP formation was inhibited if  $[Ca^{2+}]_i$  was raised with ionomycin. The chloride permeability of mammalian epithelial cells characteristically rises during secretion, and adrenaline could increase chloride permeability in the cultured epithelia but the cells did not contain cyclic-AMP-dependent chloride channels and so this response was mediated by  $[Ca^{2+}]_i$ .

### Introduction

Sweat glands are found in essentially all mammalian groups but it is only in certain Bovidae, the primates and the Equidae that they play a significant role in thermoregulation (Jenkinson, 1973). In primates, the principal regulator of sweat secretion is acetylcholine but equine glands are unresponsive to this substance. Both types of glands, however, secrete in response to  $\beta$ -adrenergic agonists (Lovatt-Evans and Smith, 1956; Robertshaw and Taylor, 1969; Anderson and Aitken, 1977; Sato, 1977; Snow, 1977; Sato and Sato, 1981; Johnson and Creed, 1982; Bijman and Quinton, 1984a; Sato and Sato, 1988; Bovell *et al.* 1989) and it has therefore been proposed that the equine

\*Present address: Faculty of Health Studies, Glasgow Caledonian University, Glasgow G13 1PP, UK.

sweat gland is unusual in being predominantly under  $\beta$ -adrenergic control (Bijman and Quinton, 1984a).

At the cellular level, the ionic fluxes associated with the onset of sweating in primates and horses seem very similar (Wilson *et al.* 1988a,b; Takemura *et al.* 1991), but there have been relatively few physiological studies of equine sweat glands so the stimulus-response coupling mechanism in these organs is incompletely understood. In an attempt to clarify the mechanism by which adrenergic agonists evoke secretion in equine sweat glands, we have explored the ability of these agents to evoke second-messenger signals and to evoke increased membrane chloride permeability, an important component of the secretory mechanism in mammalian epithelia (Cliff and Frizzell, 1990). These experiments were undertaken using preparations of cultured equine sweat gland epithelial cells developed for this purpose.

## Materials and methods

### *Primary culture*

The methods used to initiate cultures of equine sweat gland cells are based on protocols presented elsewhere for human glands (Lee *et al.* 1984, 1986) and so only brief details are presented here.

Samples of skin from the necks of horses that had been destroyed for humane reasons were collected into isolation medium (composition given below), trimmed of fat and hair, cut into pieces (approximately 10cm<sup>2</sup>) and immersed in 70% (v/v) ethanol for 1min; sterile techniques were used for subsequent procedures. Samples were placed in 15–20ml of isolation medium and homogenised by repeated shearing with scissors. Sweat glands were isolated from the resultant slurry (Lee *et al.* 1984), transferred to Williams medium E (supplemented as detailed below) and then incubated (37°C, 5% CO<sub>2</sub> in air) in culture medium containing collagenase (Worthington, 294i.u.ml<sup>-1</sup>) until the glandular tubule began to uncoil (20–50min). Glands were then transferred to fresh medium and incubated overnight.

Sufficient culture medium (approximately 1ml) to form a film over the plastic bottom was added to each of a series of 25cm<sup>2</sup> culture flasks. Two to four collagenase-treated glands were explanted into each flask and incubated until they attached to the plastic (24–48h). A further 2–3ml of medium was then added to each flask and incubation continued for 14–28 days; the medium was changed every 3–4 days.

### *Secondary culture*

Each primary culture was washed with phosphate-buffered saline (PBS) before treatment with trypsin (0.25%) in Hank's balanced salt solution (HBSS) for 3min to dislodge fibroblasts, which were then removed by washing with PBS. This procedure was repeated 2–3 times. Epithelioid cells were detached using trypsin (0.24%) plus EDTA (0.1mmol l<sup>-1</sup>) in HBSS after preincubation (10min, 37°C) in 0.1mmol l<sup>-1</sup> EDTA in PBS. The cells were washed twice by centrifugation (5min at 800g) and resuspension in culture medium, and were then plated onto 24-well culture plates (5 × 10<sup>4</sup> cells per well).

*Initiation and maintenance of cell lines*

Primary cultures were washed with HBSS and incubated (37°C) in Dispase II (Boehringer). This is a proteolytic enzyme of bacterial origin that characteristically dislodges epithelial cells as intact cell sheets or as large cell clumps. The detached cell sheets from four to five primary cultures were pooled and allowed to settle from the enzyme solution, which was then discarded, along with any cells that had remained in suspension.

The sheets were washed by repeated settling from HBSS and a suspension of small cell clumps was prepared by trituration (approximately 1min) in approximately 0.2ml of trypsin in EDTA. This enzyme was inactivated by addition of 9.8ml of culture medium containing 5% foetal calf serum. Samples (approximately 1ml) of the resultant suspension of cell clumps were plated in 25cm<sup>2</sup> tissue culture flasks. 2–3ml of culture medium was added to each flask when cellular attachment had occurred.

*Light and electron microscopy*

The expression of cytokeratin was used as a cytological marker of epithelial lineage. This antigen was detected using a monoclonal antibody (AE1/AE3, Boehringer Mannheim Biochemica, 1:100 dilution) in a standard immunoperoxidase technique (Vectastain Elite ABC Kit, Vector Labs). Normal mouse ascites fluid served as a negative control and the technique was verified by the detection of cytokeratin in rabbit epidermis.

Cultured cells were routinely examined using a Nikon Diaphot phase contrast microscope. Cells growing on glass microscope slides were mounted in a drop of physiological salt solution for differential interference contrast microscopy (Zeiss Axiophot).

Cells on glass coverslips or cells that had been removed from culture flasks using Dispase II were fixed (2% glutaraldehyde in 100mmol l<sup>-1</sup> sodium cacodylate) and processed for electron microscopy as described elsewhere (Montgomery *et al.* 1982) and examined in a Zeiss 109 transmission electron microscopy.

*Quantification of cell growth*

Cells were plated on 24-well plates (5×10<sup>4</sup> cells per well). 3h later all wells were washed three times with HBSS to remove non-viable cells. Separate samples of cell suspension (5×10<sup>4</sup> cells) were washed by centrifugation and resuspension in HBSS and the cells were then dissolved in approximately 1ml of 1% (w/v) sodium dodecylsulphate (SDS) in 300mmol l<sup>-1</sup> sodium hydroxide (SDS–NaOH) to enable the protein content of the inoculum to be determined. At given time intervals after plating, the culture medium was withdrawn and the growing cells were thoroughly washed with HBSS to ensure complete removal of the serum present in the culture medium. Cellular protein was then extracted from each well using approximately 1ml of SDS–NaOH. The protein contents of the inoculum and of each well were subsequently assayed (Lowry *et al.* 1951). Plating efficiency was defined as the proportion of cellular protein which remained attached to the plastic after washing at 3h. Data are presented as means ± standard errors and values of *N* refer to the number of experiments.

*Measurement of cellular cyclic AMP*

Cells grown (3–4 days) on 24-well plates were washed twice with physiological salt solution containing theophylline ( $1\text{mmol l}^{-1}$ ) and incubated at  $37^\circ\text{C}$  in this buffer for 10 min. Cellular cyclic AMP was extracted by adding  $10\ \mu\text{l}$  of perchloric acid (80% w/v) to each well and was subsequently quantified by radioimmunoassay (Amersham kit). Cellular protein content was also determined (see above) and data are expressed as pmol cyclic AMP per mg of cellular protein ( $\text{pmol mg}^{-1}$ ). This method is described in detail elsewhere (Wong and Huang, 1990).

The effects of various drugs were studied by including them in the physiological salt solution throughout the incubation period. Unless otherwise stated, all measurements of cyclic AMP content were therefore made in the presence of theophylline ( $1\text{mmol l}^{-1}$ ).

Cells at different passage number were considered to be statistically independent and data are usually presented as means  $\pm$  standard errors, where the value of  $N$  refers to the number of different passages. In some instances, however, we present mean values that were derived from repeated measurements of cells at a single passage. These data are presented as means  $\pm$  standard deviations and the values of  $N$  refer to the number of replicate measurements that were made.

*Regulation of cellular chloride permeability*

Cells grown in 35 mm diameter Petri dishes (3–4 days) were loaded with  $^{125}\text{I}$  by incubation (1–1.5 h,  $37^\circ\text{C}$ ) in physiological salt solution containing  $\text{Na}^{125}\text{I}$  ( $1\text{--}4\ \mu\text{Ci ml}^{-1}$ ) and the rate of isotope efflux was subsequently quantified. Changes in  $^{125}\text{I}$  efflux rate were assumed to reflect changes in cellular chloride permeability (Venglarik *et al.* 1990). All experiments were undertaken using a paired experimental protocol in which one dish of cells served as a control. Data are presented as means  $\pm$  standard errors and values of  $N$  refer to the number of experiments. All protocols were repeated using cells from at least three different passages. This method is described in detail elsewhere (Venglarik *et al.* 1990).

*Measurement of  $[\text{Ca}^{2+}]_i$* 

Coverslips bearing growing cells (2 days after plating) were washed with physiological salt solution (composition given below) and the cells then loaded with either Indo-1 or Fura-2. These calcium-sensitive fluorochromes were loaded by incubating the cells for approximately 30 min in physiological salt solution containing the acetyoxymethyl ester (AM) form of the appropriate dye ( $5\ \mu\text{mol l}^{-1}$ ) and dimethylsulphoxide (DMSO 0.5% v/v). The coverslips were then mounted in a small heated chamber fixed to the stage of a Nikon Diaphot inverted microscope where the cells were superfused ( $33\text{--}35^\circ\text{C}$ ,  $5\text{--}6\text{ ml min}^{-1}$ ) with physiological salt solution. An increase in  $[\text{Ca}^{2+}]_i$  will cause a rise in the fluorescence ratio recorded from cells loaded with such fluorochromes, thus allowing changes in  $[\text{Ca}^{2+}]_i$  to be recorded using standard, microspectrofluorimetric techniques (Grynkiewicz *et al.* 1985). Absolute calibration of these signals is, however, very difficult to achieve for cells loaded using the AM form of such dyes (Highsmith *et al.* 1986) and

experimental records are therefore presented as fluorescence ratios. No correction was made for autofluorescence which was less than 5% of the signal from a loaded cell.

### Solutions

The isolation medium contained (in  $\text{mmol l}^{-1}$ ): NaCl, 100; KCl, 4.8;  $\text{KH}_2\text{PO}_4$ , 1.2;  $\text{MgSO}_4$ , 1.2;  $\text{CaCl}_2$ , 1.3;  $\text{NaHCO}_3$ , 20; 4-(2-hydroxyethyl)-1-piperazine-ethanesulphonic acid (Hepes), 25; and D-glucose, 10; pH adjusted to 7.4 with NaOH.

The physiological salt solution contained ( $\text{mmol l}^{-1}$ ): NaCl, 130; KCl, 5; Hepes, 20;  $\text{MgCl}_2$ , 1;  $\text{CaCl}_2$ , 1; D-glucose, 10. The pH was adjusted to 7.4 with NaOH.

The culture medium was Williams Medium E containing: L-glutamine ( $1\text{mmol l}^{-1}$ ), penicillin ( $100\text{i.u. ml}^{-1}$ ), streptomycin ( $100\ \mu\text{g ml}^{-1}$ ), bovine insulin ( $100\ \mu\text{g ml}^{-1}$ ), hydrocortisone ( $10\text{ng ml}^{-1}$ ), transferrin ( $10\ \mu\text{g ml}^{-1}$ ) and trace element mix (0.5%). Unless otherwise stated the medium also contained epidermal growth factor (EGF,  $20\text{ng ml}^{-1}$ ) and foetal calf serum (5%).

## Results

### *Isolation of sweat glands and initiation of cultures*

Equine sweat glands were smaller and more fragile than their human counterparts and this significantly complicated their identification, isolation and handling. With practice, however, 10–50 glands could be obtained from a skin specimen, although the glandular ducts invariably became detached during the isolation process.

Cellular outgrowth became evident from about half of the explanted glands after 24–48h in culture. Cells were initially seen migrating from points on the glandular tubule (Fig. 1A) or from the open ends of tubules and, after 3–4 days, active cultures consisted of roughly circular areas (0.2–0.5mm in diameter) of polygonal and spindle-shaped cells (Fig. 1B). After 5–7 days these cells had adopted polygonal morphology, although fibroblasts also grew in most cultures. Growth could be maintained for 2–4 weeks, by which time cultures contained roughly circular areas (2–3cm in diameter) of epithelioid cells (Fig. 1C).

Several attempts were made to disaggregate these cultures by simply incubating them in trypsin plus EDTA. Although the fibroblasts detached rapidly, the epithelioid cells were very resistant to this enzyme solution, and once they been detached (30–45min) they were no longer viable. Primary cultures were, however, successfully disaggregated by sequential incubation in trypsin (which selectively removed fibroblasts), followed by EDTA and finally by trypsin plus EDTA, which detached the epithelioid cells within approximately 5min. The cells obtained from two animals were pooled and successfully plated onto 24-well plates. They were allowed to grow for three days, by which time they had formed an essentially continuous layer of epithelioid cells (Fig. 1D). The mean protein content of each well was  $42.8 \pm 2.7\ \mu\text{g}$ .

### *Cyclic AMP production by cells in secondary cultures*

Adrenaline ( $10\ \mu\text{mol l}^{-1}$ ) increased the cyclic AMP content of the cells in secondary culture and this response was mimicked by the  $\beta$ -adrenoceptor agonist isoprenaline.

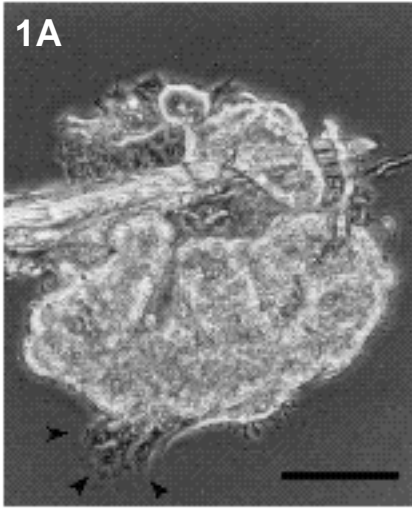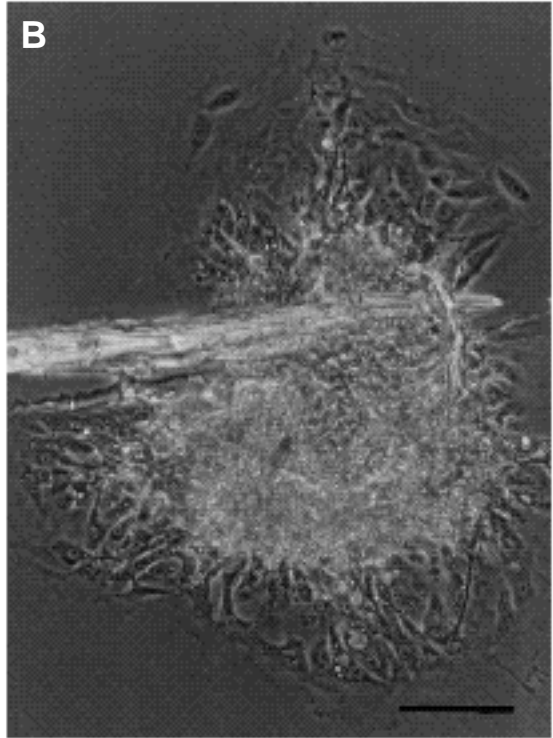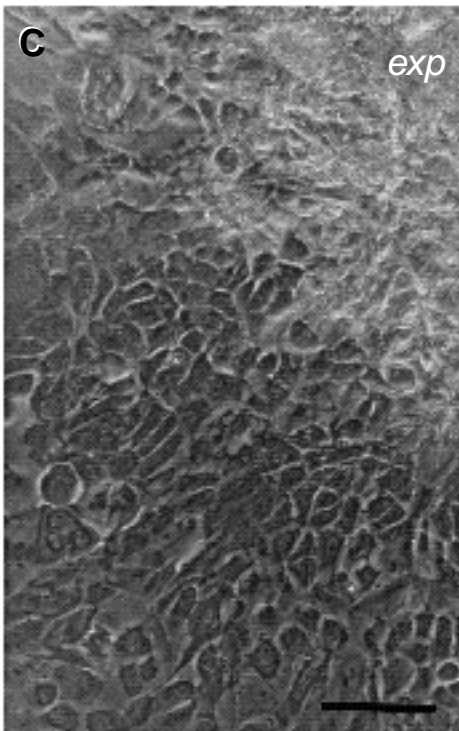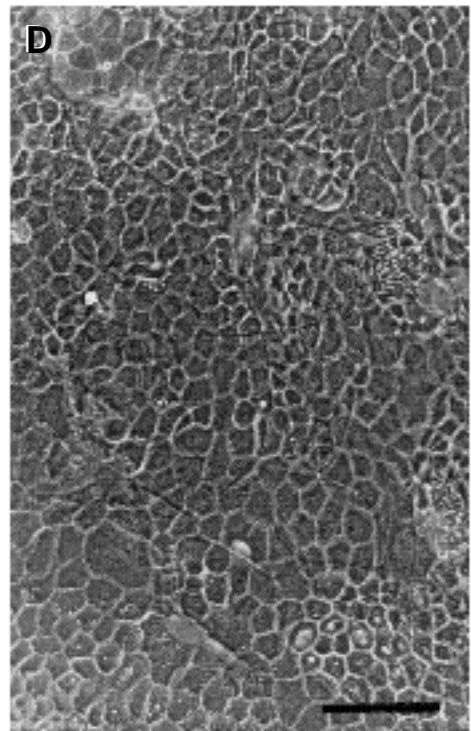

Table 1. Cyclic AMP production by cells in secondary culture

| Culture conditions                       | Cellular cyclic AMP content (pmolmg <sup>-1</sup> ) | Increase over basal (fold increase) | % of response to forskolin |
|------------------------------------------|-----------------------------------------------------|-------------------------------------|----------------------------|
| Basal                                    | 0.051±0.006                                         | 0                                   | 0                          |
| +Ionomycin (0.1 µmol l <sup>-1</sup> )   | 0.049±0.004                                         | 0                                   | 0                          |
| +Adrenaline (10 µmol l <sup>-1</sup> )   | 0.189±0.096                                         | 2.8                                 | 37                         |
| +Isoprenaline (10 µmol l <sup>-1</sup> ) | 0.206±0.011                                         | 3.2                                 | 42                         |
| +Forskolin (100 µmol l <sup>-1</sup> )   | 0.425±0.063                                         | 7.6                                 | 100                        |

Each value is the mean ± standard deviation of three determinations. The experimental data have been further analysed to express the increases in cyclic AMP content both as a function of the unstimulated cyclic AMP content and as a percentage of the mean response to forskolin.

Forskolin, an alkaloid that directly activates adenylate cyclase, also increased cyclic AMP content but the response was larger than the responses to either adrenaline or isoprenaline. The calcium ionophore ionomycin did not affect cellular cyclic AMP content (Table 1).

#### Initiation of cell lines

Dispase II disaggregated primary cultures slowly (0.5–2h). The epithelioid cells were removed from the plastic surface as intact sheets, whereas fibroblasts either remained attached to the plastic or were released as single cells. During this disaggregation process it was often apparent that the epithelioid cells had grown on top of a layer of fibroblasts.

The large sheets of epithelioid cells could easily be separated from the fibroblasts because they settled out of suspension much faster. A suspension of small clumps of epithelioid cells (Fig. 2A) could then be prepared by very brief treatment with trypsin plus EDTA. These retained the capacity for vigorous growth (Fig. 2B) and gave rise to secondary cultures consisting primarily of epithelioid cells. These cultures were maintained by serial passage (Dispase II followed by trypsin plus EDTA) and, at each stage, fewer fibroblasts were present until, by passage 5, they consisted exclusively of epithelioid cells. At this stage it became apparent that suspensions of viable cells could be prepared by relatively brief (10–15min) exposure to trypsin plus EDTA. The properties of the epithelioid cells had thus changed such that they could be maintained as cell lines using standard techniques.

Two such lines have been established (E/91/15 and E/92/3) and have now been maintained for 40–70 passages (1:3 split at each passage). They thus represent a

Fig. 1. Phase contrast micrographs showing the growth of equine sweat gland cells in culture. (A) An isolated gland 24h after explantation: some cellular outgrowth is visible at this stage (arrowheads). (B) The same gland 80h after explantation: it is now surrounded by an area of cells approximately 0.5mm in diameter. The transverse light mark in A and B is a needle scratch made on the plastic surface at the time of explant which served as a location marker. (C) Cells after 7 days in primary culture. The original explant is still visible in the upper right-hand corner (*exp*) but has now lost all discernible glandular structure, and the migrating cells have adopted epithelioid morphology. (D) Three days after passage onto multi-well plates the cells are almost contiguous with one another and retain their epithelioid morphology. Scale bar, 100 µm.

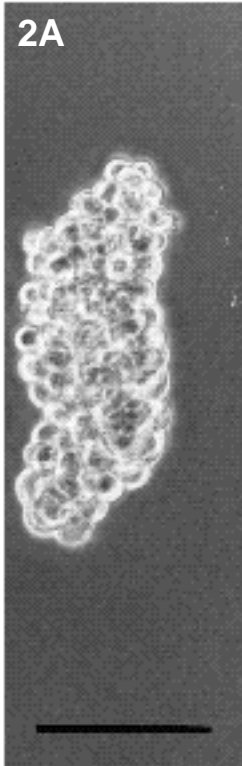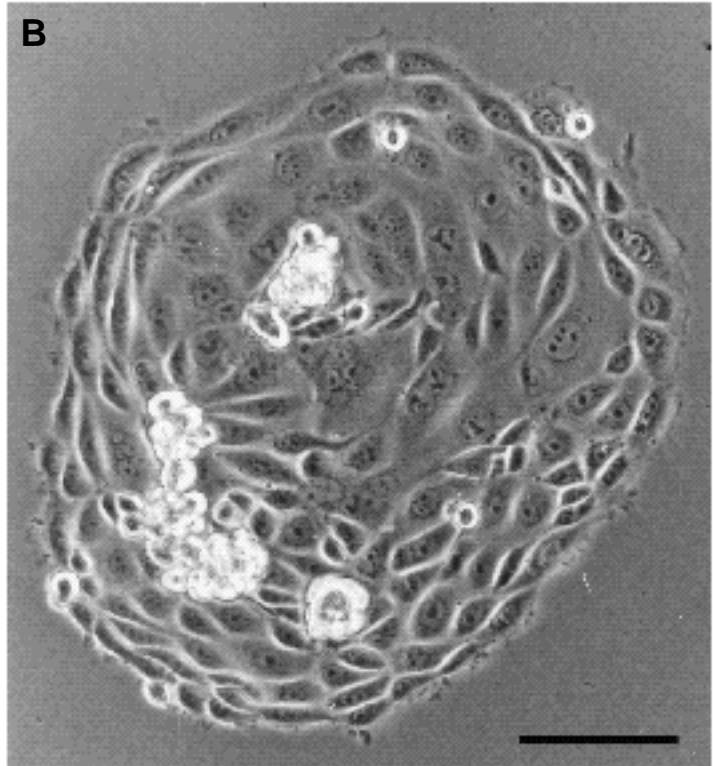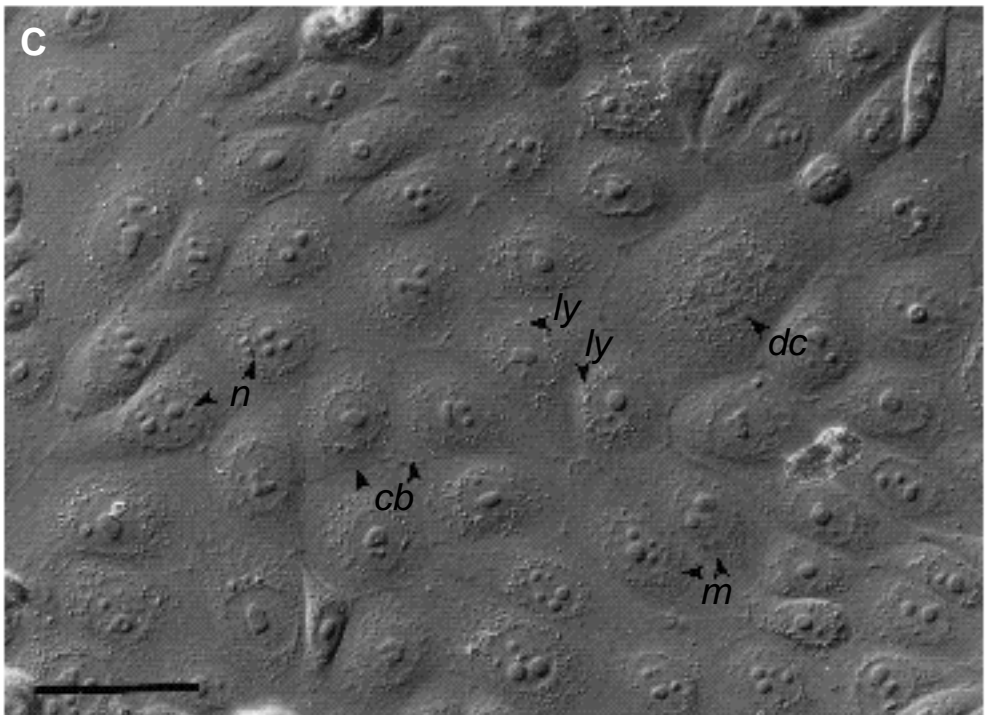



Fig. 2. Phase contrast micrographs showing the growth of equine sweat gland cells in secondary culture. (A) A clump of cells prepared using Dispase II and photographed 4h after plating onto plastic: the cells have attached to the surface but no cellular growth is evident. (B) The same field 24h after plating: the clump has given rise to an area (approximately 0.5mm in diameter) of actively growing epithelioid cells. (C) Differential interference contrast micrograph of a coherent culture of equine sweat gland epithelial cells at passage 12. Cell borders are evident (*cb*), mitochondria (*m*) are visible as faint elongated profiles in many cells, and lysosomes (*ly*) are seen as light, spherical objects around the nuclei (*n*) which usually contain nucleoli. A dividing cell (*dc*) is present. Scale bars, 100  $\mu\text{m}$  (A,B), 20  $\mu\text{m}$  (C).

potentially inexhaustible supply of experimental material and subsequent experiments were directed towards exploring their properties.

#### *Pattern of cellular growth*

Both cell lines retained epithelioid morphology (Fig. 2C) and continued to express cytokeratin, a cytological marker of epithelial lineage (Fig. 3). The cells usually grew to an essentially coherent monolayer within 3–4 days of plating.

We explored the extent to which the attachment and growth of the cells are dependent

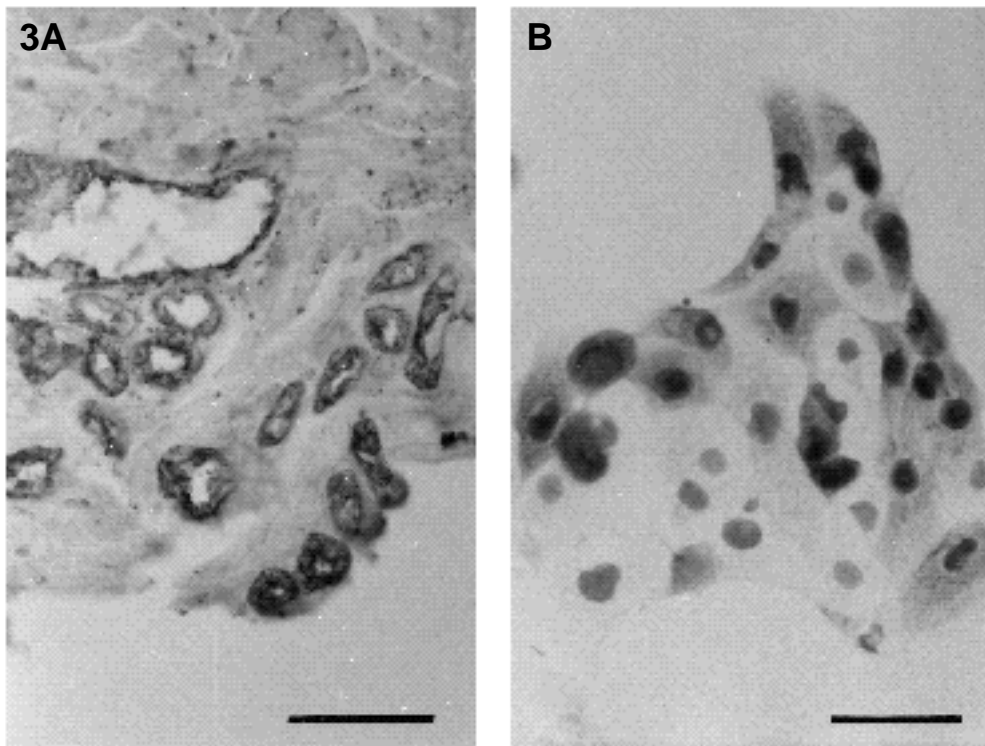

Fig. 3. Immunohistochemical demonstration of cytokeratin in a cryostat section of unfixed horse skin and in cultured equine sweat gland cells grown on glass microscope slides. (A) The sweat gland coil stains positively (dark) against the surrounding collagen/fibrocyte stroma. (B) This antigen was also present in the cultured cells, which appear variably dark according to the amount and thickness of stained cytokeratin. Scale bars, 100  $\mu\text{m}$  (A), 50  $\mu\text{m}$  (B).

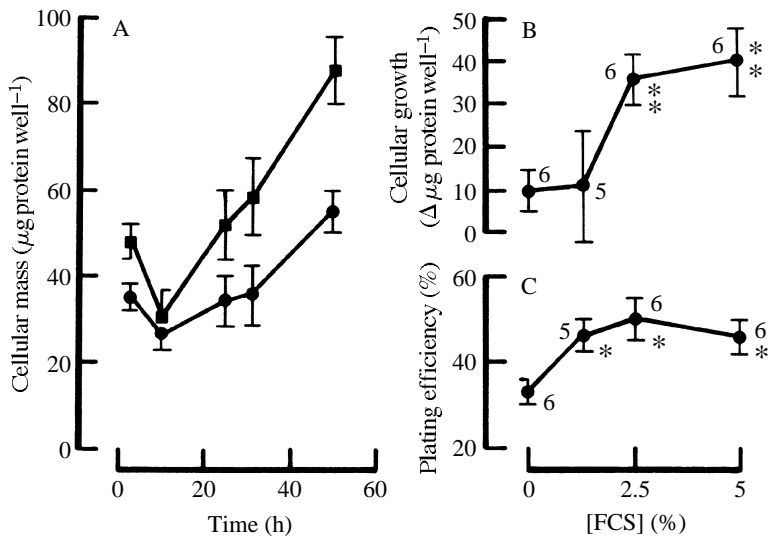

Fig. 4. Growth of cultured equine sweat gland cells. (A) The pattern of growth observed in a paired experimental protocol ( $N=6$ ) either in serum-free medium (●) or in 5% foetal calf serum (■). The growth observed over the entire 60h period (B) and the plating efficiency (C) have been plotted against the concentration of foetal calf serum (FCS) in the culture medium. Values of  $N$  are given beside each point. \* $P<0.05$ , \*\* $P<0.02$  (paired  $t$ -test).

upon the presence of foetal calf serum in the culture medium (Fig. 4). In these experiments the non-viable cells were washed away 3h after seeding so that plating efficiency could be determined. Plating efficiency was stimulated by foetal calf serum, although the effect was not concentration-dependent (Fig. 4C). The growing cells were then washed again at 8h so that the mass of cellular protein present could be determined as an indicator of growth. Although small colonies of growing cells were observed in each well, there was an apparent fall in the amount of protein present (Fig. 4A). Washing at 8h therefore removed significant numbers of cells from the cultures and so these data do not accurately reflect growth. After this time, however, there was a clear increase in cellular mass, and this growth was stimulated by foetal calf serum (Fig. 4A). The protein content at 3h was therefore subtracted from that present at the end of the experimental period (60h) in order to provide an index of total growth. These data have been plotted against the concentration of foetal calf serum present in the medium. Growth was erratic in 1.25% foetal calf serum but was stimulated by higher concentrations (Fig. 4B).

Fig. 5. Electron micrographs of cultured equine epithelia. (A) Cells grown to near coherence, fixed whilst still attached to the coverslip and sectioned perpendicular to the plane of the coverslip. Lateral interdigitations, *id*; junctional complex, *jc*; secreted material, *sm*; coated vesicle, *cv*; mitochondria, *m*; microvillus, *mv*; nucleus, *n*; rough endoplasmic reticulum, *rer*. (B) Low-power view of a sheet of cells detached from the substratum with Dispase II and sectioned perpendicular to the sheet. Basal processes, *bp*; other lettering as in A. (C) Higher-power micrograph of the margins of adjacent Dispase-II-treated cells showing a zonula occludens (*zo*) and a zonula adherens (*za*). Glycogen granules, *gly*; lysosome, *ly*. Other lettering as in A. Scale bars, 0.5  $\mu\text{m}$  (A,C), 5  $\mu\text{m}$  (B).

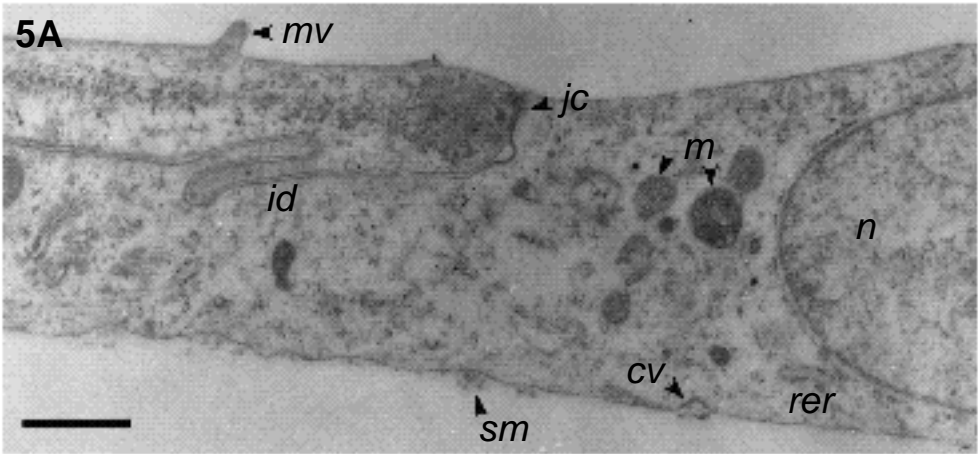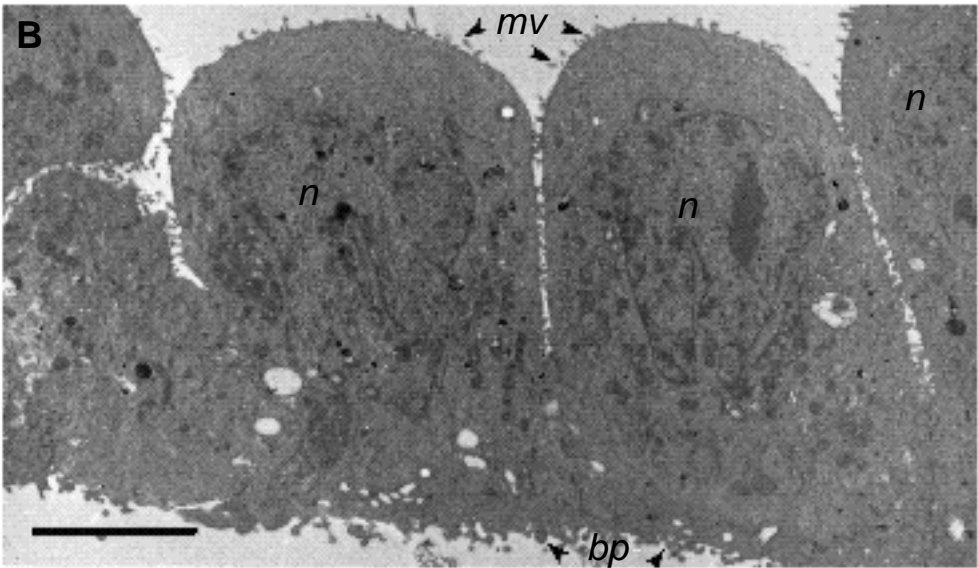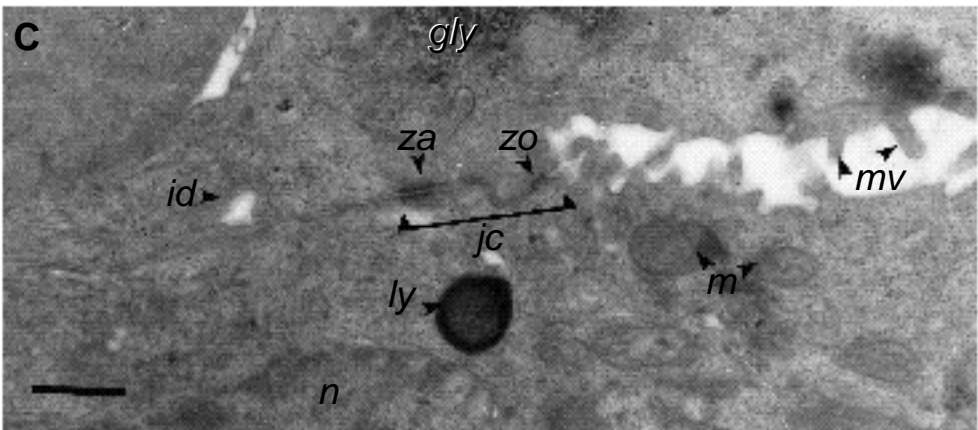

Analogous experiments were undertaken to explore the extent to which growth was dependent upon epidermal growth factor (EGF). They were conducted in 5% serum and the cells were not washed at 8h. The absence of EGF did not significantly affect plating efficiency (EGF-free,  $31.6 \pm 4.5\%$ ; control,  $37.6 \pm 3.7\%$ ;  $N=7$ ,  $P > 0.05$ , paired *t*-test) or cellular growth (EGF-free,  $80.4 \pm 9.9 \mu\text{g}$  protein; control,  $97.4 \pm 12.5 \mu\text{g}$  protein;  $N=7$ ,  $P > 0.05$ , paired *t*-test) over the 60h experimental period.

#### *Ultrastructure*

Electron microscopy revealed that the cells grew as a monolayer on glass coverslips or on plastic (Fig. 5A). The cells were approximately  $20 \mu\text{m}$  in diameter but were flattened, being only approximately  $2 \mu\text{m}$  deep at their nuclear regions. Overlap of the peripheral regions of neighbouring cells was common and these cell contacts were maintained by lateral interdigitations, junctional complexes (Fig. 5A) and by numerous desmosomes. Sparse, stubby microvilli were present on the upward-facing side of the cells and some secreted material was present at the surface in contact with the coverslip.

Cells which had been removed from plastic with Dispase II had a cuboidal appearance ( $15\text{--}20 \mu\text{m}$  deep). The stubby microvilli were still present on the upward-facing surface, and basal processes were now evident on the surface that had been attached to the plastic. The lateral interdigitations were still present and the junctional complexes retained their integrity (Fig. 5B): both zonulae occludentes and zonulae adherentes could be identified (Fig. 5C). Desmosomes and gap junctions were also commonly seen.

#### *Cyclic AMP production by the cell lines*

There was no significant difference in the basal (i.e. unstimulated) cyclic AMP content of the two cell lines. Both lines also showed essentially the same response to forskolin and to adrenaline, although the latter response was smaller than the former (Table 2). Assuming that the response to forskolin represents the maximal rate of cyclic AMP

Table 2. *Cyclic AMP production by the cell lines*

|                                           | Cellular cyclic AMP content ( $\text{pmolmg}^{-1}$ ) |                     |          |
|-------------------------------------------|------------------------------------------------------|---------------------|----------|
|                                           | E/91/15<br>( $N=4$ )                                 | E/92/3<br>( $N=7$ ) | <i>P</i> |
| Basal                                     | $0.026 \pm 0.006$                                    | $0.024 \pm 0.005$   | $>0.05$  |
| +Forskolin ( $100 \mu\text{mol l}^{-1}$ ) | $2.155 \pm 0.700$                                    | $3.788 \pm 0.744$   | $>0.05$  |
| +Adrenaline ( $1 \mu\text{mol l}^{-1}$ )  | $0.366 \pm 0.073$                                    | $0.230 \pm 0.036$   | $>0.05$  |
| % under adrenergic control                | $18.0 \pm 2.4$                                       | $6.9 \pm 1.6$       | $<0.001$ |

The amount of cyclic AMP present in each cell line was quantified both under basal (i.e. unstimulated) conditions and also in the presence of either forskolin or adrenalin.

Data are presented as means  $\pm$  standard errors, values of *N* refer to the number of different passages.

Increases in cyclic AMP content evoked by adrenaline and by forskolin were calculated by subtracting the basal cyclic AMP content from the value measured under stimulated conditions. Responses to adrenaline were then expressed as a percentage of the response to forskolin, in order to calculate the percentage of the cyclic-AMP-generating capacity that was under adrenergic control.

The significance of any apparent differences between the two cell lines was tested using Student's unpaired *t*-test.

production, it appears that more of the cellular cyclic-AMP-generating capacity is under hormonal control in the E/91/15 cells (Table 2). In subsequent analyses, hormonally induced cyclic AMP accumulation was therefore expressed as the fraction of the response to a standard dose of adrenaline.

This response to adrenaline ( $1 \mu\text{mol l}^{-1}$ ) was essentially unaffected by the  $\alpha$ -adrenoceptor antagonist phentolamine ( $1 \mu\text{mol l}^{-1}$ ,  $14.2 \pm 6.9\%$  inhibition;  $N=3$ ,  $P>0.05$ , paired  $t$ -test) but was essentially abolished by propranolol, a  $\beta$ -adrenoceptor antagonist ( $1 \mu\text{mol l}^{-1}$ ,  $98 \pm 2\%$  inhibition;  $N=3$ ,  $P<0.02$ , paired  $t$ -test). Cyclic AMP accumulation is thus mediated by  $\beta$ -adrenoceptors.

The response to adrenaline was dose-dependent and the concentration required to evoke a half-maximal response ( $\text{EC}_{50}$ ) was estimated to be  $0.044 \pm 0.004 \mu\text{mol l}^{-1}$  (Fig. 6A). Noradrenaline could also evoke cyclic AMP production but, although the maximal response was the same as that evoked by adrenaline, noradrenaline was approximately 75-fold less potent (Fig. 6B,  $\text{EC}_{50}=3.2 \pm 1.4 \mu\text{mol l}^{-1}$ ).

$\beta$ -Adrenoceptors can be subdivided into two broad types,  $\beta_1$  and  $\beta_2$  (Lands *et al.* 1967). In further experiments cells were stimulated with  $0.2 \mu\text{mol l}^{-1}$  adrenaline, which normally increased cellular cyclic AMP content from  $0.11 \pm 0.022 \text{ pmol mg}^{-1}$  to  $0.538 \pm 0.107 \text{ pmol mg}^{-1}$  ( $N=6$ ). Atenolol, a  $\beta_1$  antagonist, caused a dose-dependent inhibition of this response (Fig. 7). The inhibitory actions of the  $\beta_2$  antagonist butoxamine were explored in an analogous series of experiments in which adrenaline ( $0.2 \mu\text{mol l}^{-1}$ ) normally increased cellular cyclic AMP content from  $0.112 \pm 0.022 \text{ pmol mg}^{-1}$  to  $0.527 \pm 0.109 \text{ pmol mg}^{-1}$  ( $N=6$ ). Although the results (Fig. 7)

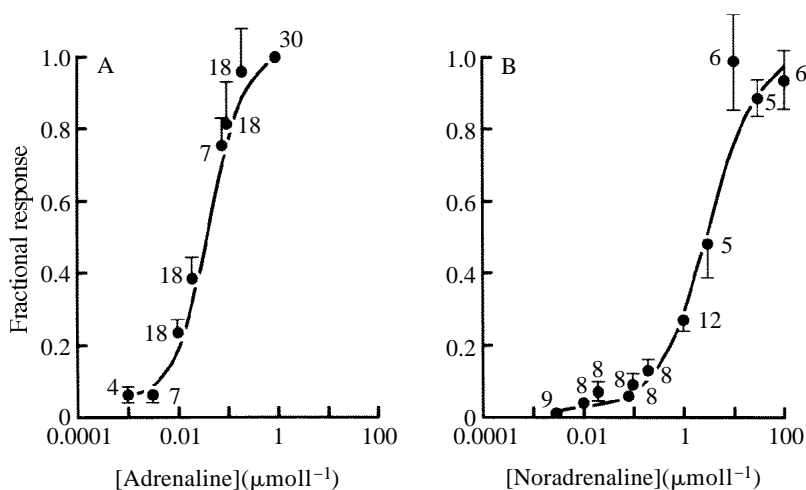

Fig. 6. Adrenergic control of adenylate cyclase activity in cultured sweat gland cells. In these experiments the mean, unstimulated cyclic AMP content was  $0.096 \pm 0.023 \text{ pmol mg}^{-1}$  and this increased to  $0.800 \text{ pmol mg}^{-1}$  after incubation in  $1 \mu\text{mol l}^{-1}$  adrenaline ( $N=30$ ). All responses to adrenaline (A) and to noradrenaline (B) were expressed as fractions of this response and these data have been plotted against the concentration of agonist used. Sigmoid curves were fitted to the data using a least-squares regression procedure in which each data point was weighted according to the reciprocal of its standard deviation.  $N$  values are given beside each point.

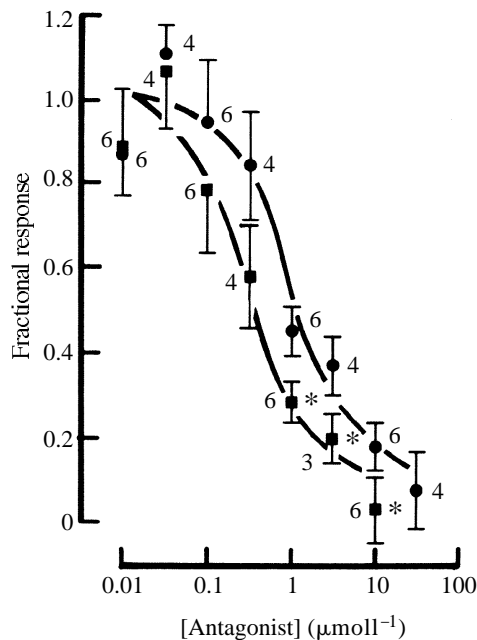

Fig. 7. Inhibitory effects of atenolol (●) and butoxamine (■). The responses to  $0.2 \mu\text{mol l}^{-1}$  adrenaline evoked in the presence of these compounds were expressed as fractions of the control response and these data have been plotted against the concentration of the antagonist used. Sigmoid curves were fitted to the data using a least-squares regression procedure in which each data point was weighted according to the reciprocal of its standard deviation. Differences between the degree of inhibition produced by these two compounds were tested using a paired *t*-test. \* $P < 0.05$ . *N* values are given beside each point.

suggested that butoxamine was a slightly more potent inhibitor than atenolol, the concentrations required for half-maximal inhibition did not differ significantly (butoxamine,  $0.31 \pm 0.16 \mu\text{mol l}^{-1}$ ; atenolol  $0.80 \pm 0.5 \mu\text{mol l}^{-1}$ ). Analysis of variance, however, indicated that these two data sets did not belong to the same statistical population ( $P < 0.05$ ), and further examination of the data revealed that butoxamine was a more effective antagonist than atenolol but that this effect was only apparent within a limited concentration range ( $1\text{--}10 \mu\text{mol l}^{-1}$ , Fig. 7). The observation that adrenaline is a more potent agonist than noradrenaline, together with the finding that butoxamine can inhibit the response to adrenaline more effectively than atenolol, strongly suggests that adrenaline-evoked cyclic AMP accumulation is mediated by receptors belonging to the  $\beta_2$  subclass (Lands *et al.* 1967).

The secretory responses of isolated equine glands can show some dependence upon calcium (Bijman and Quinton, 1984*b*) and so the effects of raising the intracellular free calcium concentration ( $[\text{Ca}^{2+}]_i$ ) upon adrenaline-evoked cyclic AMP production were studied. In these experiments the cyclic AMP content of unstimulated cells was  $0.091 \pm 0.019 \text{ pmol mg}^{-1}$  ( $N=9$ ) and adrenaline ( $1 \mu\text{mol l}^{-1}$ ) increased this by  $0.830 \pm 0.229 \text{ pmol mg}^{-1}$ . The calcium ionophore ionomycin did not affect resting cyclic

AMP content ( $0.088 \pm 0.018 \text{ pmol mg}^{-1}$ ,  $P > 0.05$ , paired  $t$ -test) but did inhibit the response to adrenaline ( $0.277 \pm 0.068 \text{ pmol mg}^{-1}$ ,  $P < 0.05$ , paired  $t$ -test). These data therefore suggest that raising  $[\text{Ca}^{2+}]_i$  can inhibit receptor-mediated cyclic AMP production.

#### Regulation of cellular chloride permeability

An increase in cellular chloride permeability is an important component of the secretory response of mammalian epithelia (Cliff and Frizzell, 1990) and so the ability of adrenaline to influence chloride permeability was monitored using the  $^{125}\text{I}$  efflux technique (Venklarik *et al.* 1990).

Under control conditions isotope efflux was essentially monoexponential. Adrenaline, in the presence of the phosphodiesterase inhibitor theophylline, evoked only a small and rather variable increase in the rate of efflux (Fig. 8A). The mean rate constant over the three samples collected immediately after addition of these drugs was greater than the corresponding value measured from the control cells ( $P < 0.05$ , paired  $t$ -test); adrenaline can therefore increase cellular chloride permeability.

Adrenaline evokes cyclic AMP production (Fig. 6), but the data presented in Fig. 8B show that the permeability did not change when cells were exposed to a cocktail of compounds that activate cyclic-AMP-dependent responses in other cell types (Gray *et al.* 1989; Cliff and Frizzell, 1990). Raising the cyclic AMP concentration does not, therefore, evoke increased chloride permeability. Ionomycin, however, could consistently evoke a

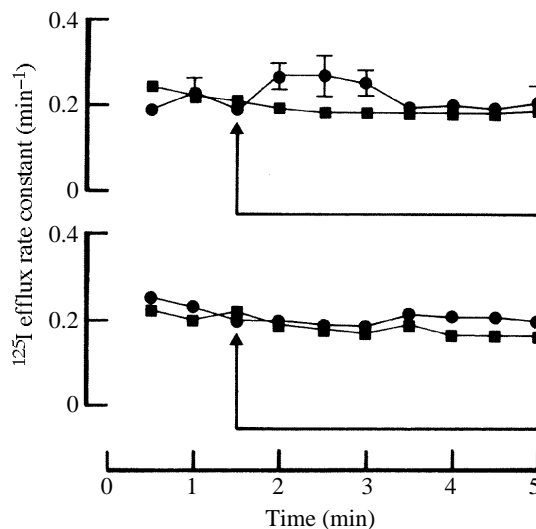

Fig. 8. Regulation of cellular chloride permeability. Rate constants for  $^{125}\text{I}$  efflux are plotted against superfusion time. (A) Data ( $N=5$ ) from control cells (■) and from cells which were exposed to  $10 \mu\text{mol l}^{-1}$  adrenaline and  $1 \mu\text{mol l}^{-1}$  theophylline (●) for the period indicated; (B) Data ( $N=7$ ) from control cells (■) and from cells which had been exposed to a cocktail of compounds (forskolin,  $10 \mu\text{mol l}^{-1}$ ; isomethylbutylxanthine,  $100 \mu\text{mol l}^{-1}$ ; dibutyryl-cyclic AMP,  $100 \mu\text{mol l}^{-1}$ ) designed to evoke a maximal cyclic-AMP-dependent response (●).

large permeability increase, which strongly suggests that the chloride permeability of these cells can be regulated by  $[Ca^{2+}]_i$  (Fig. 9).

#### *Regulation of $[Ca^{2+}]_i$*

Adrenaline ( $10 \mu\text{mol l}^{-1}$ ) increased  $[Ca^{2+}]_i$  in each of three Indo-1-loaded preparations, although the responses were small and variable (Fig. 10). Forskolin ( $10 \mu\text{mol l}^{-1}$ ) caused no visible change in  $[Ca^{2+}]_i$  over a 3min period ( $N=3$ ) in parallel experiments conducted using cells at the same passage, and further experiments on these cells showed that this concentration of forskolin causes a large (approximately 35-fold) rise in cellular cyclic AMP content (control,  $0.047 \pm 0.001 \text{ pmol mg}^{-1}$ ; forskolin,  $1.75 \pm 0.36 \text{ pmol mg}^{-1}$ ; mean  $\pm$  s.d.,  $N=4$ ). The increase in  $[Ca^{2+}]_i$  therefore does not appear to be secondary to the rise in cyclic AMP.

The properties of this response to adrenaline were investigated further in cells which had been loaded with Fura-2. In these experiments,  $1 \mu\text{mol l}^{-1}$  adrenaline increased  $[Ca^{2+}]_i$  in 6 out of 8 preparations, and  $10 \mu\text{mol l}^{-1}$  adrenaline increased  $[Ca^{2+}]_i$  in 4 out of 5 preparations. Similar increases were evoked by isoprenaline, either at  $1 \mu\text{mol l}^{-1}$  (2 out of 2 preparations) or at  $10 \mu\text{mol l}^{-1}$  (8 out of 12 preparations), whereas phenylephrine ( $10 \mu\text{mol l}^{-1}$ ) increased  $[Ca^{2+}]_i$  in 3 out of 9 preparations.

### Discussion

#### *The culture of equine sweat gland epithelia*

If human skin is homogenised by repeated shearing, sweat glands 'pop out' from the surrounding connective tissue and can be readily picked out of the skin slurry (Lee *et al.* 1984). If these glands are explanted and cultured under favourable conditions, outgrowth of epithelial cells can occur (Pedersen, 1984; Collie *et al.* 1985; Lee *et al.* 1986).

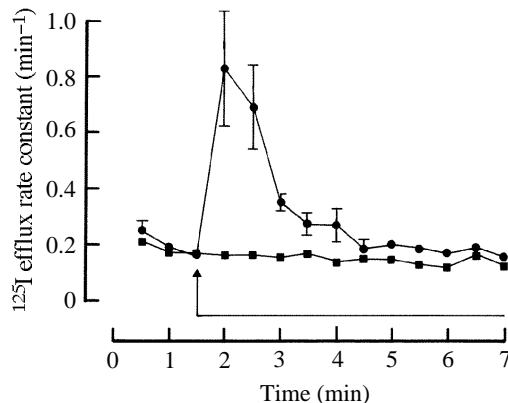

Fig. 9. Effects of ionomycin on cellular chloride permeability. Rate constants for  $^{125}\text{I}$  efflux are plotted against superfusion time for control cells (■) and for cells exposed to  $0.1 \mu\text{mol l}^{-1}$  ionomycin ( $N=6$ , ●).



Equine sweat glands could also be isolated and cultured using this approach, but with greater difficulty as horse skin did not readily homogenise and the equine glands were smaller and much more fragile. This significantly complicated both their isolation and subsequent handling. The ascending ducts were usually detached from the glands during isolation and so the growing cells were almost certainly all derived from the coiled part of the glandular tubule. In the horse, this contains only a secretory epithelium, as there is no equine analogue of the specialised reabsorptive epithelium found within the primate gland (Montgomery *et al.* 1982, 1985). Moreover, only a single secretory cell type is present, although the tubule also contains myoepithelial cells and fibrocytes (Montgomery *et al.* 1982). The possibility that at least some of the epithelioid cells may be derived from the myoepithelium cannot be excluded, but this does seem unlikely as cultures from human secretory coils do not contain cells with the electrophysiological characteristics of myoepithelial cells (Reddy *et al.* 1992; Reddy and Quinton, 1992).

Suspensions of viable equine cells could only be prepared using trypsin plus EDTA if the primary cultures were preincubated in trypsin and then in EDTA but, as with human pancreatic duct cells (Harris and Coleman, 1987), the use of Dispase II greatly facilitated the establishment of secondary cultures.

The life span of epithelial cell cultures established from human sweat glands or pancreatic ducts is limited by the restricted proliferative capacity of human epithelial cells (Lee *et al.* 1986; Harris and Coleman, 1987; Lee and Dessi, 1989; Buchanan *et al.*

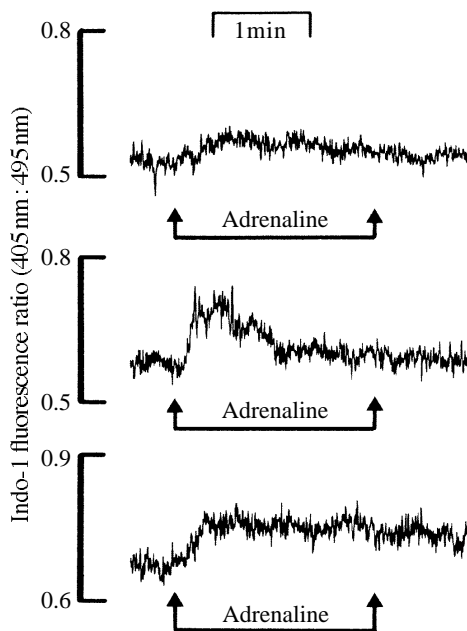

Fig. 10. The effects of adrenaline ( $10 \mu\text{mol l}^{-1}$ ) upon  $[\text{Ca}^{2+}]_i$  in three preparations of cells loaded with Indo-1. Fluorescence ratios were recorded from areas containing 10–50 confluent cells, and the signals were filtered at 3Hz ( $-3\text{dB}$  frequency). Cells were exposed to adrenaline as indicated.

1990). Equine cultures, however, have now been maintained for over 50 passages whilst retaining epithelioid morphology and continuing to express cytokeratin, a marker of epithelial lineage. Horse sweat gland epithelial cells thus appear to be capable of undergoing spontaneous transformation into essentially 'immortal' cell lines. The growth of these cells was not inhibited when EGF was withdrawn and so, at least over the time period of the present experiments, they do not appear to require this growth factor. They did, however, retain some dependence upon the growth factors present in serum. The equine cell lines therefore seem to display the low dependence upon exogenous growth factors that is typical of transformed cells (Freshney, 1987).

These cell lines therefore provide a potentially inexhaustible source of experimental material. Physiological studies of some other such 'immortal' epithelial cell lines have provided valuable insights into the mechanism of transepithelial salt and water transport (e.g. Dharmasathaphorn *et al.* 1984; Simmons, 1993). The epithelial cell lines established in the present study may therefore provide a valuable experimental model of the equine sweat gland epithelium, permitting physiological investigations of the factors that regulate secretion in these organs. This will, however, depend crucially upon the extent to which the cells retain the features of the parent epithelium, so subsequent experiments were directed towards exploring their physiological properties.

#### *The generation of second-messenger signals*

Earlier studies (Snow, 1977; Bijman and Quinton, 1984a) have shown that secretion from equine sweat glands is mediated by adrenoceptors belonging to the  $\beta_2$  subclass (Lands *et al.* 1967). The pharmacological properties of cyclic AMP production in the cultured cells and of secretion in intact glands (Snow, 1977; Bijman and Quinton, 1984a) were essentially identical, supporting the view that cyclic AMP plays an important role in stimulus–secretion coupling in the equine sweat gland (Bijman and Quinton, 1984b).

Secretion from the sweat glands in small skin plugs of horse skin can become acutely dependent upon calcium after prolonged incubation in calcium-free solutions. Changes in  $[Ca^{2+}]_i$  may therefore play a role in stimulus–secretion coupling (Bijman and Quinton, 1984b). Adrenaline increased  $[Ca^{2+}]_i$  in the cultured cells. This rise was not secondary to the increased cellular cyclic AMP content. Changes in  $[Ca^{2+}]_i$  are one of the key mechanisms by which responses to hormones and neurotransmitters are mediated (Petersen, 1992) and so, although the adrenaline-evoked rise in  $[Ca^{2+}]_i$  was small and variable, it could constitute an important component of the signal transduction pathway.

In primate glands, receptor-regulated cyclic AMP production is augmented if  $[Ca^{2+}]_i$  is elevated (Sato and Sato, 1983). This may also be true of equine sweat glands so, even if the secretory mechanism can only be activated by cyclic AMP, changes in  $[Ca^{2+}]_i$  could still be important if they were able to modulate cyclic AMP production. This does not, however, appear to be the case because ionomycin, a calcium ionophore, did not affect the cyclic AMP content of the unstimulated cells and inhibited adrenaline-evoked cyclic AMP production. Large increases in  $[Ca^{2+}]_i$  thus appear to antagonise receptor-regulated cyclic AMP formation, although this observation does not altogether eliminate the possibility that the much smaller adrenaline-evoked increase in  $[Ca^{2+}]_i$  could augment cyclic AMP production.

Individual sweat glands in small biopsies of horse skin respond to adrenaline and to isoprenaline with a smooth increase in secretory rate that is entirely attributable to the activation of  $\beta$ -adrenoceptors (Bijman and Quinton, 1984a). These glands also secrete in response to membrane-permeant analogues of cyclic AMP, but with a longer latency and a slower onset than hormonally evoked responses (Bijman and Quinton, 1984b). Isoprenaline was observed to raise  $[Ca^{2+}]_i$  in the cultured epithelial cells and, although the pharmacology of this response is not clear, activation of  $\beta$ -adrenoceptors can increase  $[Ca^{2+}]_i$  in other epithelial cells (Takemura, 1985; Koizumi *et al.* 1991). It is possible, therefore, that increased  $[Ca^{2+}]_i$  may mediate the initial phase of the response to isoprenaline in the horse sweat gland but that cyclic AMP production subsequently maintains secretion.

#### *The regulation of cellular chloride permeability*

A secretagogue-evoked increase in cellular chloride permeability is an important part of the secretory response of mammalian epithelial cells, which characteristically contain separate chloride conductances that are activated by  $[Ca^{2+}]_i$  and by cyclic AMP (Cliff and Frizzell, 1990; Venglarik *et al.* 1990). The chloride permeability of the cultured equine cells could not be regulated by cyclic AMP, although  $[Ca^{2+}]_i$ -dependent chloride channels did appear to be present.

There is good evidence that cyclic AMP does mediate secretion from equine sweat glands and it therefore appears that functional cyclic-AMP-dependent chloride channels have been lost during culture. A recent study of a cell line derived from the human colonic epithelium showed that chloride permeability could only be regulated by cyclic AMP in cells which had become differentiated into a polarised epithelial sheet. Increases in  $[Ca^{2+}]_i$ , however, could raise the chloride permeability of both differentiated and undifferentiated cells (Morris *et al.* 1992). The protein species that constitutes the cyclic-AMP-dependent chloride channel was, however, always present, and so the insertion of functional cyclic-AMP-dependent chloride channels into the plasma membrane seems to be an event that is closely associated with the development of cellular polarity (Morris *et al.* 1992).

There was, however, evidence of polarity among the observed ultrastructural characteristics of the cultured cells. Most significantly, junctional complexes were present between adjacent cells, and these junctions were proximate to the upward-facing membrane, which thus appears to correspond to the luminal membrane of the intact gland. Their presence strongly suggests that the epithelial cells have become integrated into epithelial sheets. In the cultured cells, however, only a few, sparse and stubby microvilli were present on this membrane, whereas the intact gland normally exhibits numerous, long microvilli (Montgomery *et al.* 1982).

In conclusion, although the permeability properties of the equine sweat gland epithelia have not been investigated directly, cyclic-AMP-dependent chloride channels do appear to be present (Bijman and Quinton, 1984b). Such channels were not found in the cultured cells, possibly because they do not express a fully differentiated phenotype under the present culture conditions (Morris *et al.* 1992). The cells did, however, retain the receptors and second-messenger pathways that appear to regulate secretion from intact

glands (Bijman and Quinton, 1984*a,b*). We have thus been able to make the first direct demonstration of receptor-regulated cyclic AMP production in equine sweat gland epithelia, and our observation that adrenaline can increase  $[Ca^{2+}]_i$  may well explain why secretion from the intact glands can, at least under certain circumstances, become dependent upon external calcium (Bijman and Quinton, 1984*b*).

The authors are grateful to the Royal Hong Kong Jockey Club for financial support. We also thank R. I. Freshney for his helpful suggestions and discussions.

### References

- ANDERSON, M. G. AND AITKEN, M. M. (1977). Biochemical and physiological effects of catecholamine administration in the horse. *Res. vet. Sci.* **22**, 357–360.
- BIJMAN, J. AND QUINTON, P. M. (1984*a*). Predominantly  $\beta$ -adrenergic control of equine sweating. *Am. J. Physiol.* **246**, R349–R353.
- BIJMAN, J. AND QUINTON, P. M. (1984*b*). Influence of calcium and cyclic nucleotides on  $\beta$ -adrenergic sweat secretion in equine sweat glands. *Am. J. Physiol.* **247**, C10–C13.
- BOVELL, D. L., ELDER, H. Y., JENKINSON, D. M. AND WILSON, S. M. (1989). The control of potassium ( $^{86}Rb^+$ ) efflux in the isolated human sweat gland. *Q. Jl exp. Physiol.* **74**, 267–276.
- BUCHANAN, J. A., YEGER, H., TABCHARANI, J. A., JENSEN, T. J., AUERBACH, W., HANRAHAN, J. W., RIORDAN, J. R. AND BUCHWALD, M. (1990). Transformed sweat gland and nasal epithelial cell lines from control and cystic fibrosis individuals. *J. Cell Sci.* **95**, 109–123.
- CLIFF, W. H. AND FRIZZELL, R. A. (1990). Separate  $Cl^-$  conductances activated by cyclic AMP and  $Ca^{2+}$  in  $Cl^-$  secreting cells. *Proc. natn. Acad. Sci. U.S.A.* **87**, 4956–4960.
- COLLIE, G., BUCHWALD, M., HARPER, P. AND RIORDAN, J. R. (1985). Culture of sweat gland epithelial cells from normal individuals and patients with cystic fibrosis. *In vitro Cell. dev. Biol.* **21**, 597–602.
- DHARMSATHAPHORN, K., ROBERTS, J. A., MANDEL, K. G., TISDALE, L. D. AND MASUI, H. (1984). A human tumor cell line that maintains vectorial electrolyte transport. *Am. J. Physiol.* **246**, G204–G208.
- FRESHNEY, R. I. (1987). *Culture of Animal Cells. A Manual of Basic Technique*. 2nd edn. Chichester, Brisbane, Toronto, Singapore, New York: Wiley-Liss.
- GRAY, M. A., HARRIS, A., COLEMAN, L., GREENWELL, J. R. AND ARGENT, B. E. (1989). Two types of chloride channels on duct cells cultured from human fetal pancreas. *Am. J. Physiol.* **257**, C240–C251.
- GRYNKIEWICZ, G., POENIE, M. AND TSIEN, R. Y. (1985). A new generation of  $Ca^{2+}$ -indicators with greatly improved fluorescence properties. *J. biol. Chem.* **265**, 3440–3450.
- HARRIS, A. AND COLEMAN, L. (1987). Establishment of a tissue culture system for epithelial cells derived from human pancreas: a model for the study of cystic fibrosis. *J. Cell Sci.* **87**, 695–703.
- HIGHSMITH, S., BLOEBaum, P. AND SNOWDOWN, K. W. (1986). Sarcoplasmic reticulum interacts with the  $Ca^{2+}$  indicator fura-2-AM. *Biochem. biophys. Res. Commun.* **138**, 1153–1162.
- JENKINSON, D. M. (1973). Comparative physiology of sweating. *Brit. J. Dermatol.* **88**, 397–406.
- JOHNSON, K. G. AND CREED, K. E. (1982). Sweating in the intact horse and in isolated perfused horse skin. *Comp. Biochem. Physiol.* **73C**, 259–264.
- KOIZUMI, H., YASUI, C., FUKAYA, T., OHKAWARA, A. AND UEDA, T. (1991). Beta-adrenergic stimulation induces intracellular  $Ca^{++}$  increase in human epidermal keratinocytes. *J. invest. Derm.* **96**, 234–237.
- LANDS, A. M., ARNOLD, A., MCAULIFF, J. P., LUDUENA, F. P. AND BROWN, T. G. (1967). Differentiation of receptor systems for sympathomimetic amines. *Nature* **214**, 597–598.
- LEE, C. M., CARPENTER, F., COAKER, T. AND KEALEY, T. (1986). The primary culture of epithelia from the secretory coil and collecting duct of normal human and cystic fibrotic eccrine sweat glands. *J. Cell Sci.* **83**, 103–118.
- LEE, C. M. AND DESSI, J. (1989). NCL-SG3: a human eccrine sweat gland cell line that retains the capacity for epithelial ion transport. *J. Cell Sci.* **92**, 241–249.
- LEE, C. M., JONES, C. J. AND KEALEY, T. (1984). Biochemical and ultrastructural studies of human eccrine sweat glands isolated by shearing and maintained for seven days. *J. Cell Sci.* **72**, 259–274.
- LOVATT-EVANS, C. AND SMITH, D. F. G. (1956). Sweating responses in the horse. *Proc. R. Soc. Lond. B* **145**, 61–83.

- LOWRY, O. H., ROSEBOUGH, N. J., FARR, A. L. AND RANDALL, R. J. (1951). Protein determination with Folin phenol reagent. *J. biol. Chem.* **193**, 265–275.
- MONTGOMERY, I., JENKINSON, D. M. AND ELDER, H. Y. (1982). The effects of thermal stimulation on the ultrastructure of the fundus and duct of the equine sweat gland. *J. Anat.* **135**, 13–28.
- MONTGOMERY, I., JENKINSON, D. M., ELDER, H. Y., CZARNECKI, D. AND MAC KIE, R. M. (1985). The effects of thermal stimulation on the ultrastructure of the human atrichial sweat gland. II. The duct. *J. Anat.* **112**, 165–177.
- MORRIS, A. P., CUNNINGHAM, S. A., BENOS, D. J. AND FRIZZELL, R. A. (1992). Cellular differentiation is required for cyclic AMP but not  $\text{Ca}^{2+}$ -dependent  $\text{Cl}^-$  secretion in colonic epithelial cells expressing high levels of cystic fibrosis conductance regulator. *J. biol. Chem.* **267**, 5575–5583.
- PEDERSEN, P. S. (1984). Primary culture of epithelial cells derived from the reabsorptive coiled duct of human sweat glands. *I.C.R.S. Med. Sci.* **12**, 752–753.
- PETERSEN, O. H. (1992). Stimulus–secretion coupling: cytoplasmic calcium signals and the control of ion channels in exocrine acinar cells. *J. Physiol., Lond.* **448**, 379–397.
- REDDY, M. M., BELL, C. L. AND QUINTON, P. M. (1992). Evidence of two distinct epithelial cell types in primary cultures from human sweat gland secretory coil. *Am. J. Physiol.* **262**, C891–C898.
- REDDY, M. M. AND QUINTON, P. M. (1992). Electrophysiologically distinct cell types in human sweat gland secretory coil. *Am. J. Physiol.* **262**, C287–292.
- ROBERTSHAW, D. AND TAYLOR, C. R. (1969). Sweat gland function in the donkey (*Equus asinus*). *J. Physiol., Lond.* **205**, 79–89.
- SATO, F. AND SATO, K. (1988). Relationship between quin2-determined cytosolic  $[\text{Ca}^{2+}]$  and sweat secretion. *Am. J. Physiol.* **254**, C310–C317.
- SATO, K. (1977). The physiology, pharmacology and biochemistry of the eccrine sweat gland. *Rev. Physiol. Biochem. Pharmac.* **79**, 51–131.
- SATO, K. AND SATO, F. (1981). Role of calcium in cholinergic and adrenergic mechanisms of eccrine sweat secretion. *Am. J. Physiol.* **241**, C113–C120.
- SATO, K. AND SATO, F. (1983). Cholinergic potentiation of isoproterenol-induced cyclic AMP level in sweat gland. *Am. J. Physiol.* **245**, C189–C195.
- SIMMONS, N. L. (1993). Renal epithelial  $\text{Cl}^-$  secretion. *Exp. Physiol.* **78**, 117–137.
- SNOW, D. H. (1977). Identification of the receptor involved in adrenaline mediated sweating in the horse. *Res. vet. Sci.* **23**, 246–247.
- TAKEMURA, H. (1985). Changes in cytosolic free calcium in isolated rat parotid cells by cholinergic and  $\beta$ -adrenergic drugs. *Biochem. biophys. Res. Commun.* **131**, 1048–1055.
- TAKEMURA, T., SATO, F., SAGA, K., SUZUKI, Y. AND SATO, K. (1991). Intracellular ion concentrations and cell volume during cholinergic stimulation of eccrine secretory coil cells. *J. Membr. Biol.* **119**, 211–219.
- VENGLARIK, C. J., BRIDGES, R. J. AND FRIZZELL, R. A. (1990). A simple assay for agonist-regulated Cl and K conductances in salt-secreting epithelial cells. *Am. J. Physiol.* **259**, C358–C364.
- WILSON, S. M., ELDER, H. Y., JENKINSON, D. M. AND MCWILLIAMS, S. A. (1988a). The effects of thermally induced activity *in vivo* upon the levels of sodium, chlorine and potassium in the epithelia of the equine sweat gland. *J. exp. Biol.* **136**, 489–494.
- WILSON, S. M., ELDER, H. Y., SUTTON, A. M., JENKINSON, D. M., COCKBURN, F., MONTGOMERY, I., MCWILLIAMS, S. A. AND BOVELL, D. L. (1988b). The effects of thermally induced activity *in vivo* upon the ultrastructure and Na, K and Cl composition of the epithelial cells of sweat glands from patients with cystic fibrosis. *Tissue & Cell* **20**, 691–700.
- WONG, P. Y. D. AND HUANG, S. J. (1990). Secretory agonists stimulate a rise in intracellular cyclic AMP but not  $\text{Ca}^{2+}$  and inositol phosphates in cultured rat epididymal epithelium. *Exp. Physiol.* **75**, 321–337.
